# Supplementary material for: Development of a new generation of miniemulsion based on cottonseed oil with α-tocopherol and ZnO and evaluation of its adjuvant activity
Source: PeerJ. 2023 Mar 20;11:e14981. doi: 10.7717/peerj.14981 (PMC10035431; doi:10.7717/peerj.14981)
Supplement: Supplemental Information 1 — ELISAs and flow cytometry. [file peerj-11-14981-s001.xlsx]

## Sheet: VIABILITY
TRAT	microL/mL	splenocyte	timocyte	macrophage
CONTROL	0	95.9079	103.916
CONTROL	0	98.2097	101.567	114.627
CN	10	94.8849	101.567	104.77
CN	5	93.8619	111.227	96.7444
CN	2.5	99.7442	99.2167	87.3413
CN	1.25	103.325	97.389	96.5171
CNZ	10	100.256	102.089	98.3353
CNZ	5	94.1176	102.089	90.7645
CNZ	2.5	102.558	97.389	89.8554
CNZ	1.25	99.2327	98.1723	83.6482
CONTROL	0	104.348	99.7389	97.3694
CONTROL	0	98.2097	102.089	93.9178
CN	10	102.302	99.2167	85.4805
CN	5	93.3504	102.872	102.014
CN	2.5	100.767	96.0836	90.8639
CN	1.25	97.4425	102.35	95.949
CNZ	10	96.6752	95.3003	104.301
CNZ	5	96.4194	95.3003	86.3612
CNZ	2.5	97.1867	96.3446	99.1307
CNZ	1.25	102.046	98.6945	95.2814
CONTROL	0	103.325	97.9112	93.6621
CONTROL	0	100.256	95.3003	105.196
CN	10	94.6292	95.5614	106.474
CN	5	100.767	87.9896	110.892
CN	2.5	99.7442	99.7389	95.4234
CN	1.25	91.3043	103.133	113.889
CNZ	10	90.7928	107.311	108.861
CNZ	5	96.6752	107.311	87.6964
CNZ	2.5	99.7442	102.872	87.3413
CNZ	1.25	100.512	102.611	102.781

## Sheet: CD14
TRAT	CD14	Cell microL
CONTROL	15.1	184.3
CONTROL	6.6	64.6667
CONTROL	14.5	142.364
FCA	58.2	831.875
FCA	61	848.75
FCA	59	825.5
CN	50.2	1341.57
CN	59.8	1172
CN	56.7	1169.75
CNZ	55.2	1158.62
CNZ	51.7	780
CNZ	61.3	1052.44

## Sheet: NO y TAC
TRAT	microL/mL	NITRITE	TAC
Control (-)	0	0.1	199.523
Control (-)	0	0.086	227.305
Control (-)	0	0.085	214.677
LPS	0	0.321	260.137
LPS	0	0.363	268.977
LPS	0	0.215	281.605
CN	10	0.676	351.059
CN	10	0.703	383.892
CN	10	0.669	396.52
CN	5	0.553	354.848
CN	5	0.505	298.022
CN	5	0.534	318.226
CN	2.5	0.328	281.605
CN	2.5	0.447	285.394
CN	2.5	0.44	276.554
CN	1.25	0.251	260.137
CN	1.25	0.308	246.247
CN	1.25	0.296	290.445
Control (-)	0	0.1	199.523
Control (-)	0	0.086	227.305
Control (-)	0	0.085	214.677
LPS	0	0.321	260.137
LPS	0	0.363	268.977
LPS	0	0.215	281.605
CNZ	10	0.247	303.073
CNZ	10	0.453	324.54
CNZ	10	0.535	340.957
CNZ	5	0.394	299.284
CNZ	5	0.398	294.233
CNZ	5	0.457	304.336
CNZ	2.5	0.35	280.342
CNZ	2.5	0.326	270.24
CNZ	2.5	0.367	289.182
CNZ	1.25	0.111	274.028
CNZ	1.25	0.104	255.086
CNZ	1.25	0.29	277.817

## Sheet: NEUTRAL RED
	TRAT	OD540mn
	Clodronate	0.062
	Clodronate	0.071
	Clodronate	0.066
	Clodronate	0.067
	No treatment	0.116
	No treatment	0.108
	No treatment	0.124
	No treatment	0.101
	No treatment	0.099
	No treatment	0.095
	No treatment	0.107167
	CN	0.093
	CN	0.096
	CN	0.116
	CN	0.09
	CN	0.097
	CN	0.093
	CN	0.0975
	CNZ	0.108
	CNZ	0.099
	CNZ	0.091
	CNZ	0.091
	CNZ	0.104
	CNZ	0.112
	CNZ	0.100833

## Sheet: CANDIDA ASSAY
TRAT	Time (h)	UFC		TRAT	Time (h)	nitrite
CN	1	1041		CN	1	16.0081
CNZ	1	1023		CNZ	1	15.7665
No treatment	1	986		No treatment	1	12.5648
CN	1	963		CN	1	16.2497
CNZ	1	1024		CNZ	1	11.4171
No treatment	1	978		No treatment	1	15.5248
CN	2	954		CN	2	20.2971
CNZ	2	988		CNZ	2	8.81956
No treatment	2	997		No treatment	2	11.7191
CN	2	911		CN	2	12.444
CNZ	2	1002		CNZ	2	8.94037
No treatment	2	979		No treatment	2	8.63833
CN	3	917		CN	3	12.444
CNZ	3	973		CNZ	3	8.94037
No treatment	3	978		No treatment	3	8.63833
CN	3	896		CN	3	13.5314
CNZ	3	1032		CNZ	3	8.81956
No treatment	3	980		No treatment	3	8.21548
CN	4	952		CN	4	13.2293
CNZ	4	1097		CNZ	4	8.15507
No treatment	4	976		No treatment	4	7.49058
CN	4	1008		CN	4	12.5044
CNZ	4	1011		CNZ	4	7.97384
No treatment	4	975		No treatment	4	6.76569

## Sheet: OVA-IGg 45D
TRAT	OD 450
OVA	0.28
OVA	0.267
OVA	0.191
FCA	0.494
FCA	0.516
FCA	0.464
CN	0.35
CN	0.362
CN	0.342
CNZ	0.216
CNZ	0.213
CNZ	0.227
Control	0.135
Control	0.119
Control	0.116

## Sheet: ISOTYPE AB
Trat	Tiempo	IgG1	IgG2a	IgG2b	IgG3	IgA	IgM
FCA	7	0.278	0.291	0.51	0.23	0.226	0.338
FCA	7	0.215	0.251	0.584	0.183	0.148	0.29
OVA	7	0.178	0.244	0.543	0.178	0.145	0.242
OVA	7	0.185	0.225	0.666	0.159	0.14	0.227
CNZ	7	0.231	0.227	0.517	0.165	0.17	0.296
CNZ	7	0.186	0.236	0.611	0.157	0.12	0.254
CN	7	0.149	0.225	0.679	0.149	0.135	0.239
CN	7	0.173	0.226	0.668	0.155	0.122	0.224
FCA	14	0.241	0.361	0.638	0.258	0.227	0.329
FCA	14	0.221	0.361	0.647	0.285	0.282	0.398
OVA	14	0.177	0.379	0.517	0.227	0.297	0.461
OVA	14	0.244	0.428	0.558	0.362	0.22	0.357
CNZ	14	0.283	0.382	0.638	0.205	0.275	0.31
CNZ	14	0.311	0.471	0.594	0.241	0.329	0.462
CN	14	0.209	0.316	0.592	0.216	0.215	0.325
CN	14	0.226	0.277	0.686	0.24	0.264	0.247
FCA	28	0.663	1.001	1.227	0.167	0.337	0.797
FCA	28	0.747	0.954	1.273	0.155	0.505	1.021
OVA	28	0.181	0.341	0.978	0.111	0.129	0.707
OVA	28	0.311	0.779	0.967	0.229	0.149	0.515
CNZ	28	0.46	0.869	0.831	0.323	0.237	0.741
CNZ	28	0.734	1.204	0.951	0.268	0.416	0.652
CN	28	0.358	0.589	0.824	0.218	0.227	0.686
CN	28	0.233	0.752	1.031	0.222	0.133	0.985
FCA	42	0.327	0.393	0.786	0.241	0.273	0.238
FCA	42	0.285	0.345	0.635	0.267	0.199	0.236
OVA	42	0.112	0.312	0.636	0.261	0.197	0.268
OVA	42	0.097	0.303	0.669	0.255	0.178	0.355
CNZ	42	0.209	0.377	0.74	0.206	0.235	0.333
CNZ	42	0.087	0.331	0.575	0.199	0.191	0.241
CN	42	0.19	0.322	0.57	0.265	0.191	0.23
CN	42	0.186	0.315	0.563	0.154	0.159	0.212

## Sheet: CYTOKINES
TRAT	INF gamma	IL2	IL10
FCA 7	28.26	16.23	25.43
FCA 7	26.2	17.2	18.18
FCA 7	28.26	17.44	17.3
CN 7	37.22	20.23	29.2
CN 7	31.01	21.36	31.12
CN 7	31.01	20.69	37
CNZ 7	40.68	15.5	35.02
CNZ 7	45.56	21.58	44.05
CNZ 7	35.15	16.96	27.3
FCA 14	4.47	18.16	31.12
FCA 14	3.5	19.99	23.57
FCA 14	5.42	22.64	40
CN 14	5.61	17.92	28.25
CN 14	5.23	18.39	22.66
CN 14	3.4	21.32	28.25
CNZ 14	6.18	23.07	37.99
CNZ 14	4.76	19.31	29.2
CNZ 14	3.6	19.08	20.84
FCA 28	0	0	28.39
FCA 28	0	0
FCA 28	0	0	33.54
CN 28	0
CN 28	0	0	15.98
CN 28	0	0	44.29
CNZ 28	0
CNZ 28	0	0	12.21
CNZ 28	0	0	18.55
CONTROL	2.8	10.69	24.5
CONTROL	3.76	2.23	10.63
CONTROL	0	0	16.41
